# Supplementary material
Source: PubMed Central journal article supplement (PMC3182040)
Supplement: bbe0077-0270-s01.pdf [file bbe0077-0270-s01.pdf]

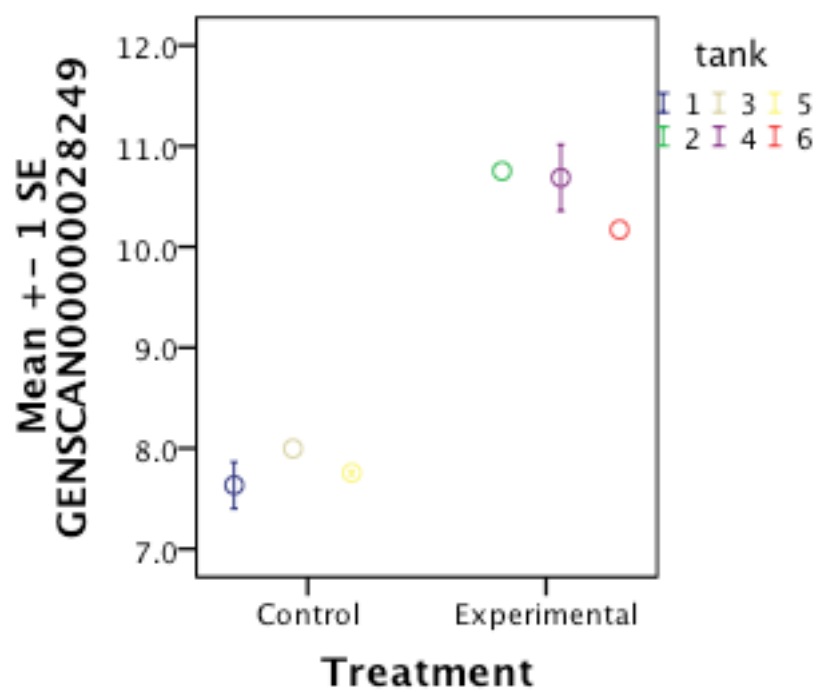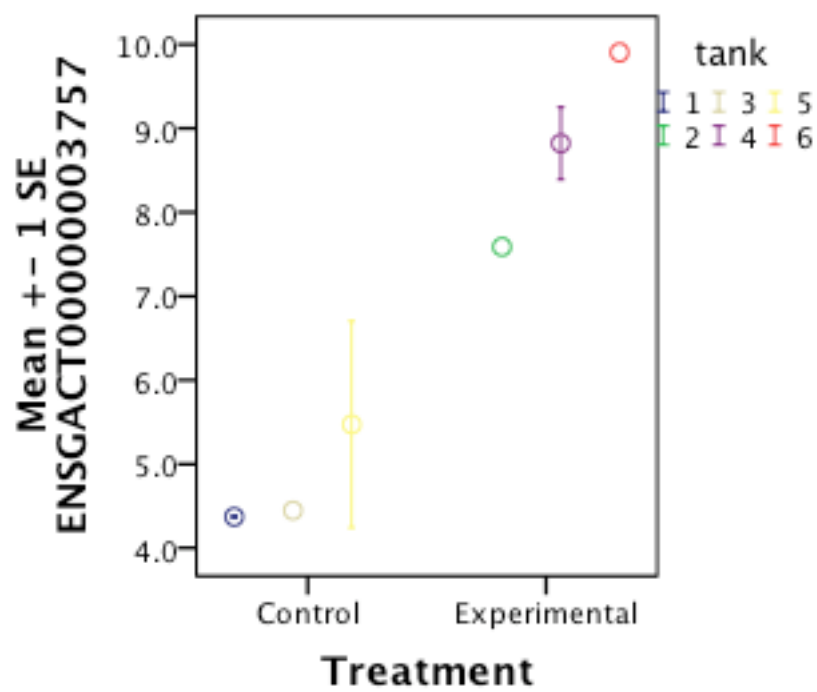

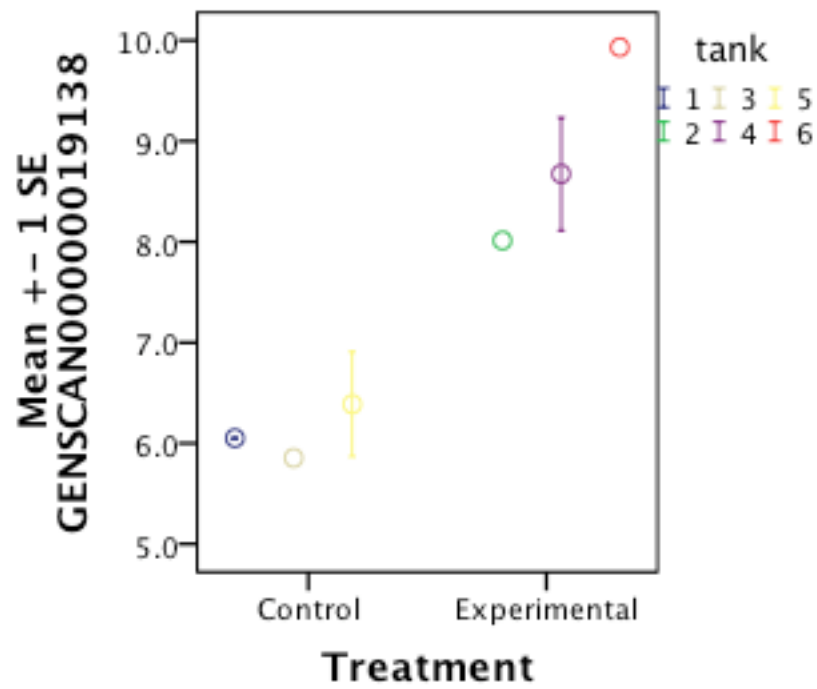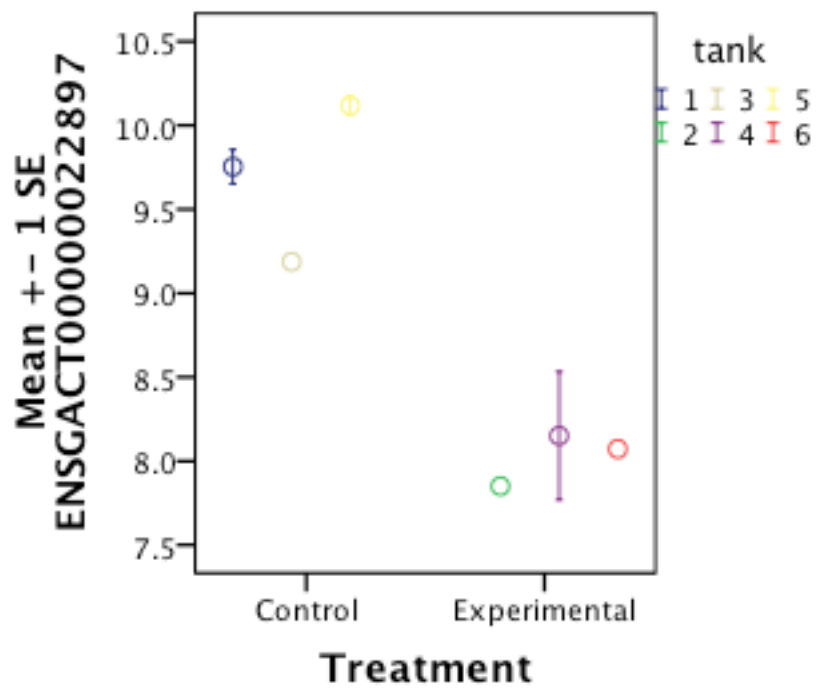

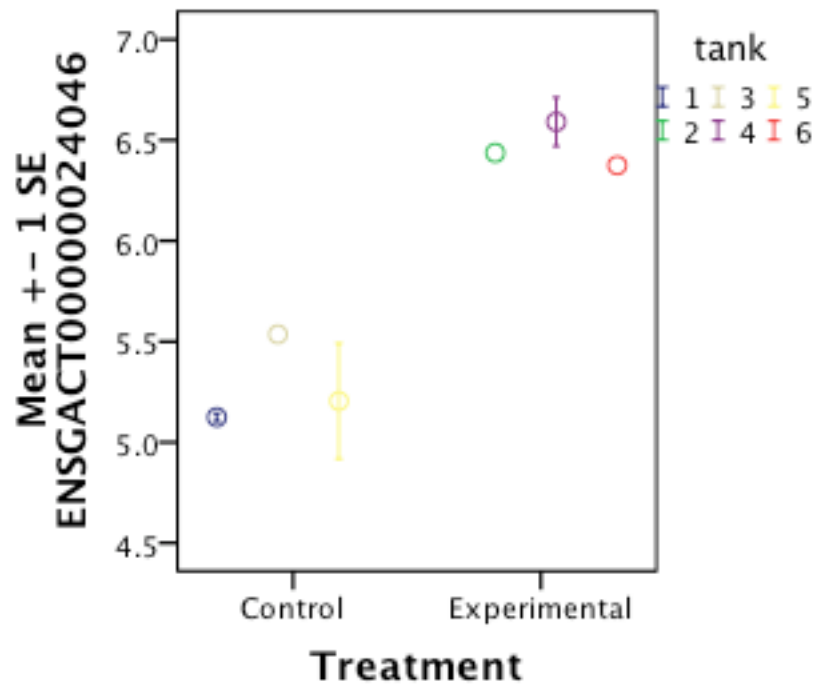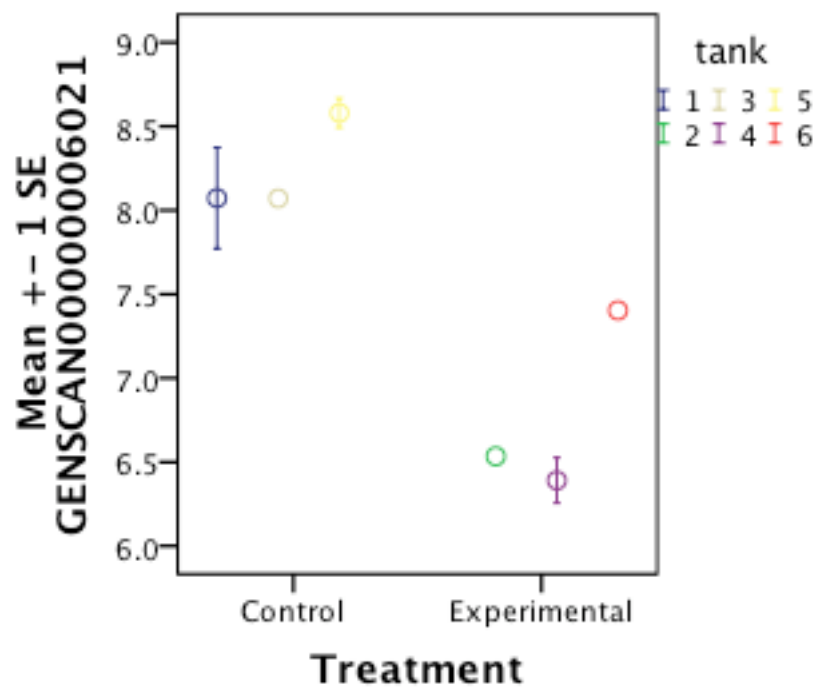

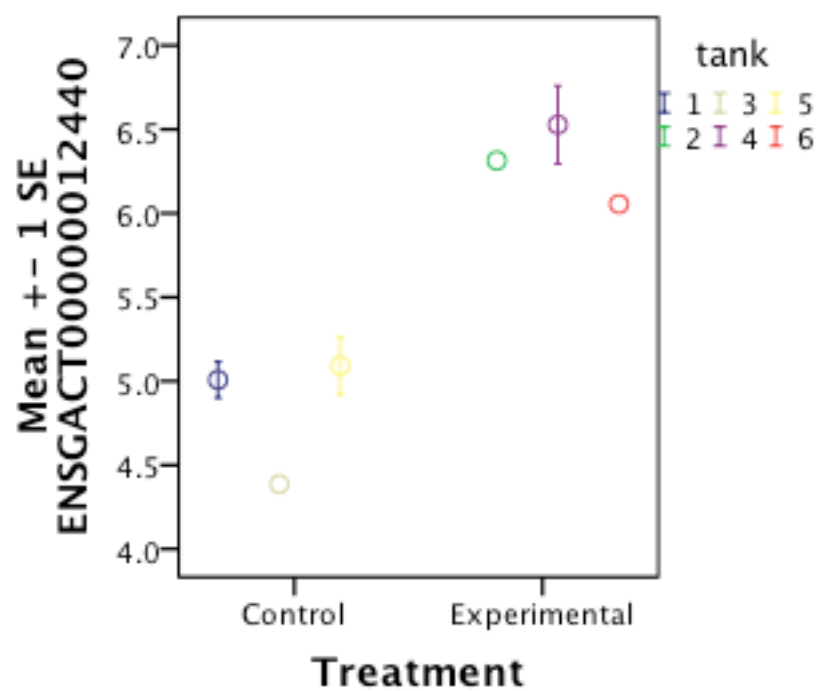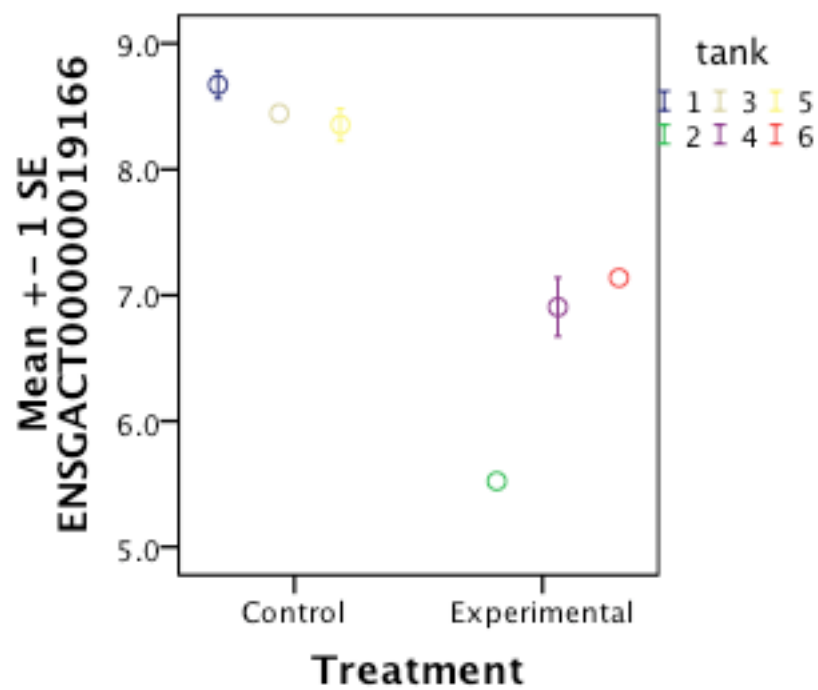

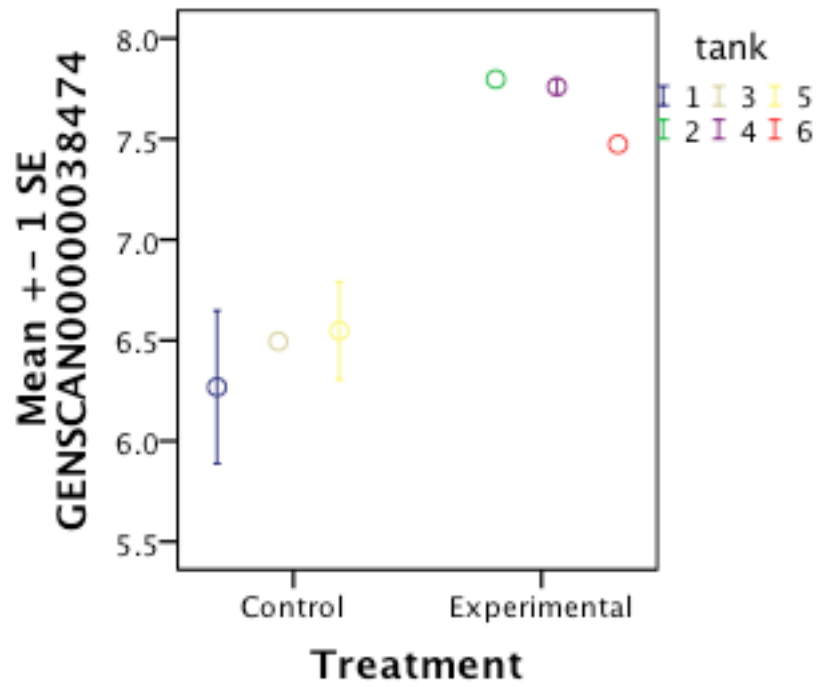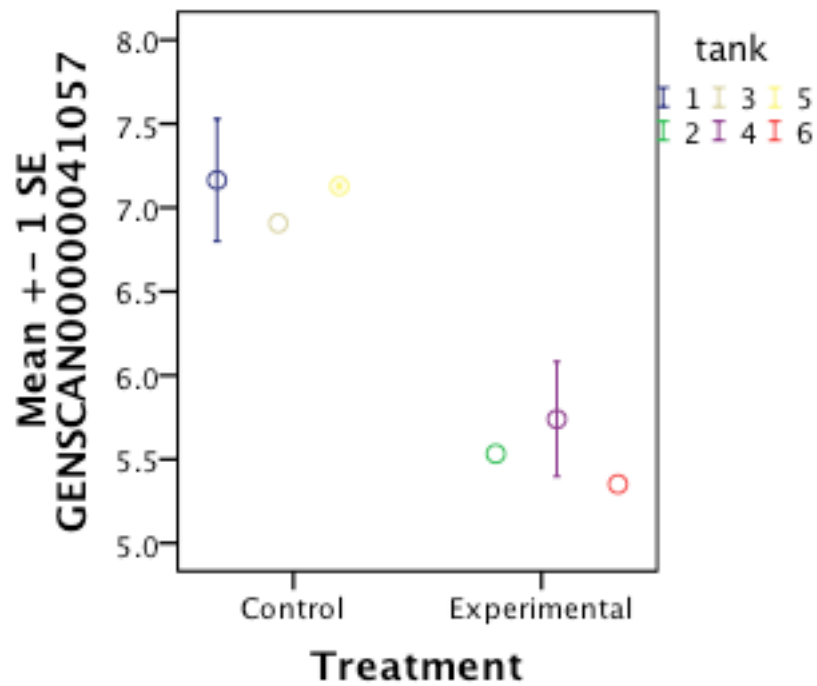

1 **Supplementary figure legend**

2

3 Supplementary Figure 1. Gene expression +/- standard error, in fluorescence units, of the top  
4 ten differentially expressed genes as a function of treatment (control or experimental) and tank.

5 Note that each gene shows clear differences between treatment groups, and no evidence that  
6 the treatment effects were driven by a disproportionate effect of certain tanks; all of the  
7 experimental tanks cluster together, while all of the control tanks cluster together. Tanks that do  
8 not show standard error bars contributed only one fish to the microarray experiment.

9
